# Supplementary material for: Strain-specific alterations in gut microbiome and host immune responses elicited by tolerogenic Bifidobacterium pseudolongum
Source: PubMed Central journal article supplement (PMC9852428; doi:10.1038/s41598-023-27706-0), 2023-01-19

# B. UMB-MBP-01 vs. control down-regulated

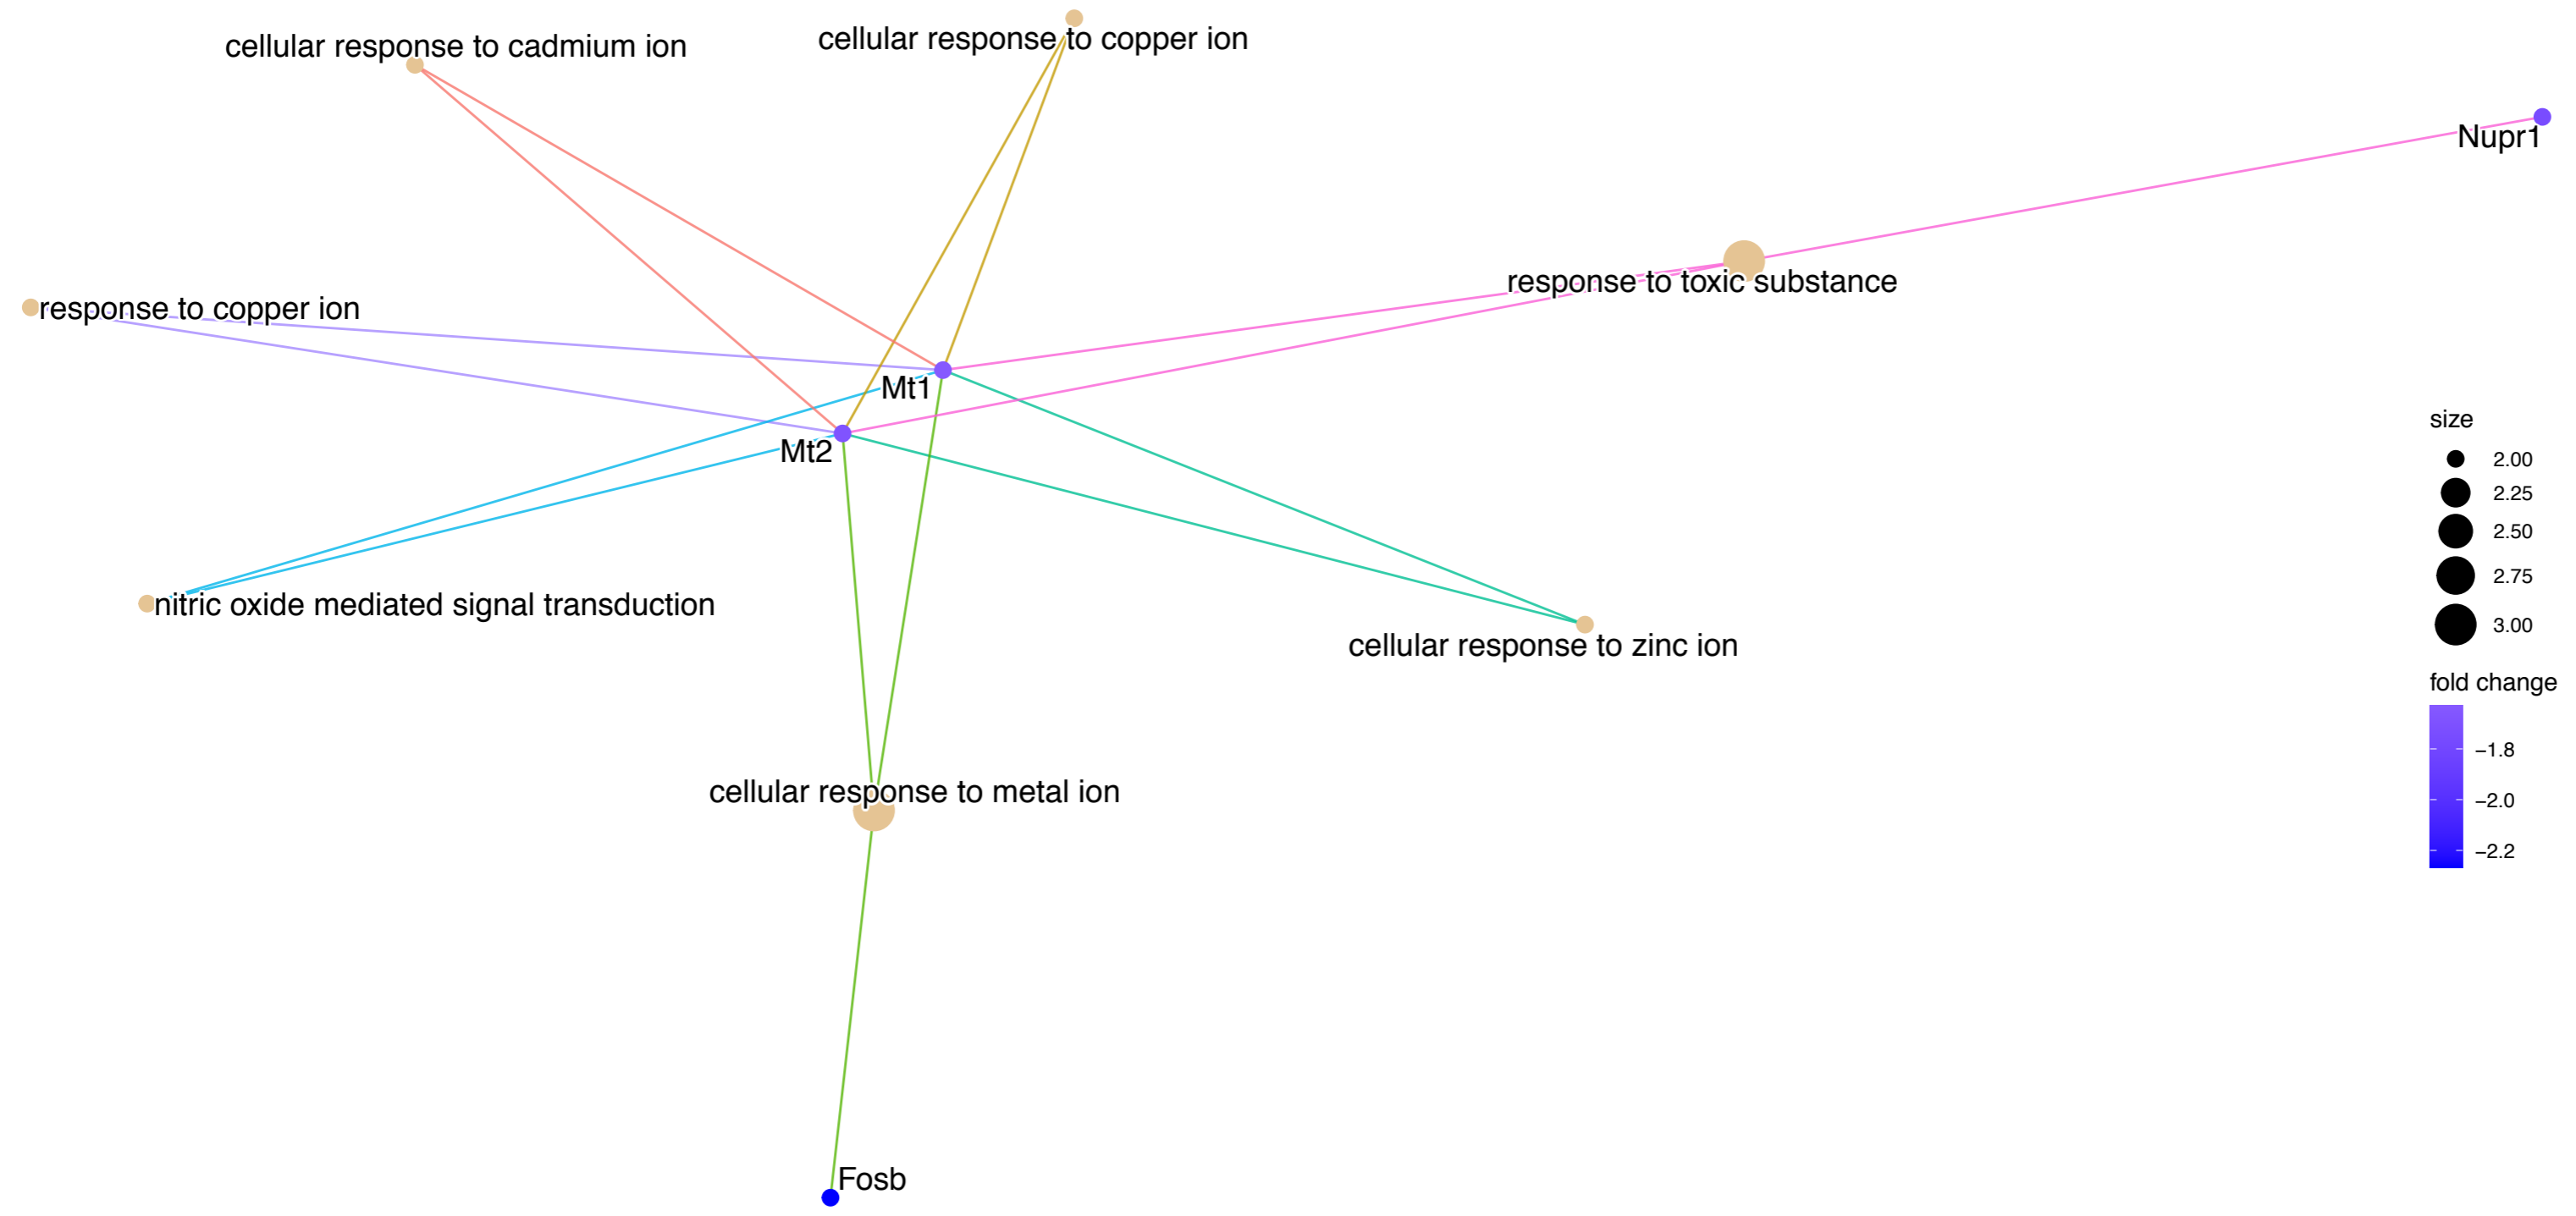



D. UMB-MBP-01 vs. ATCC25526 down-regulated

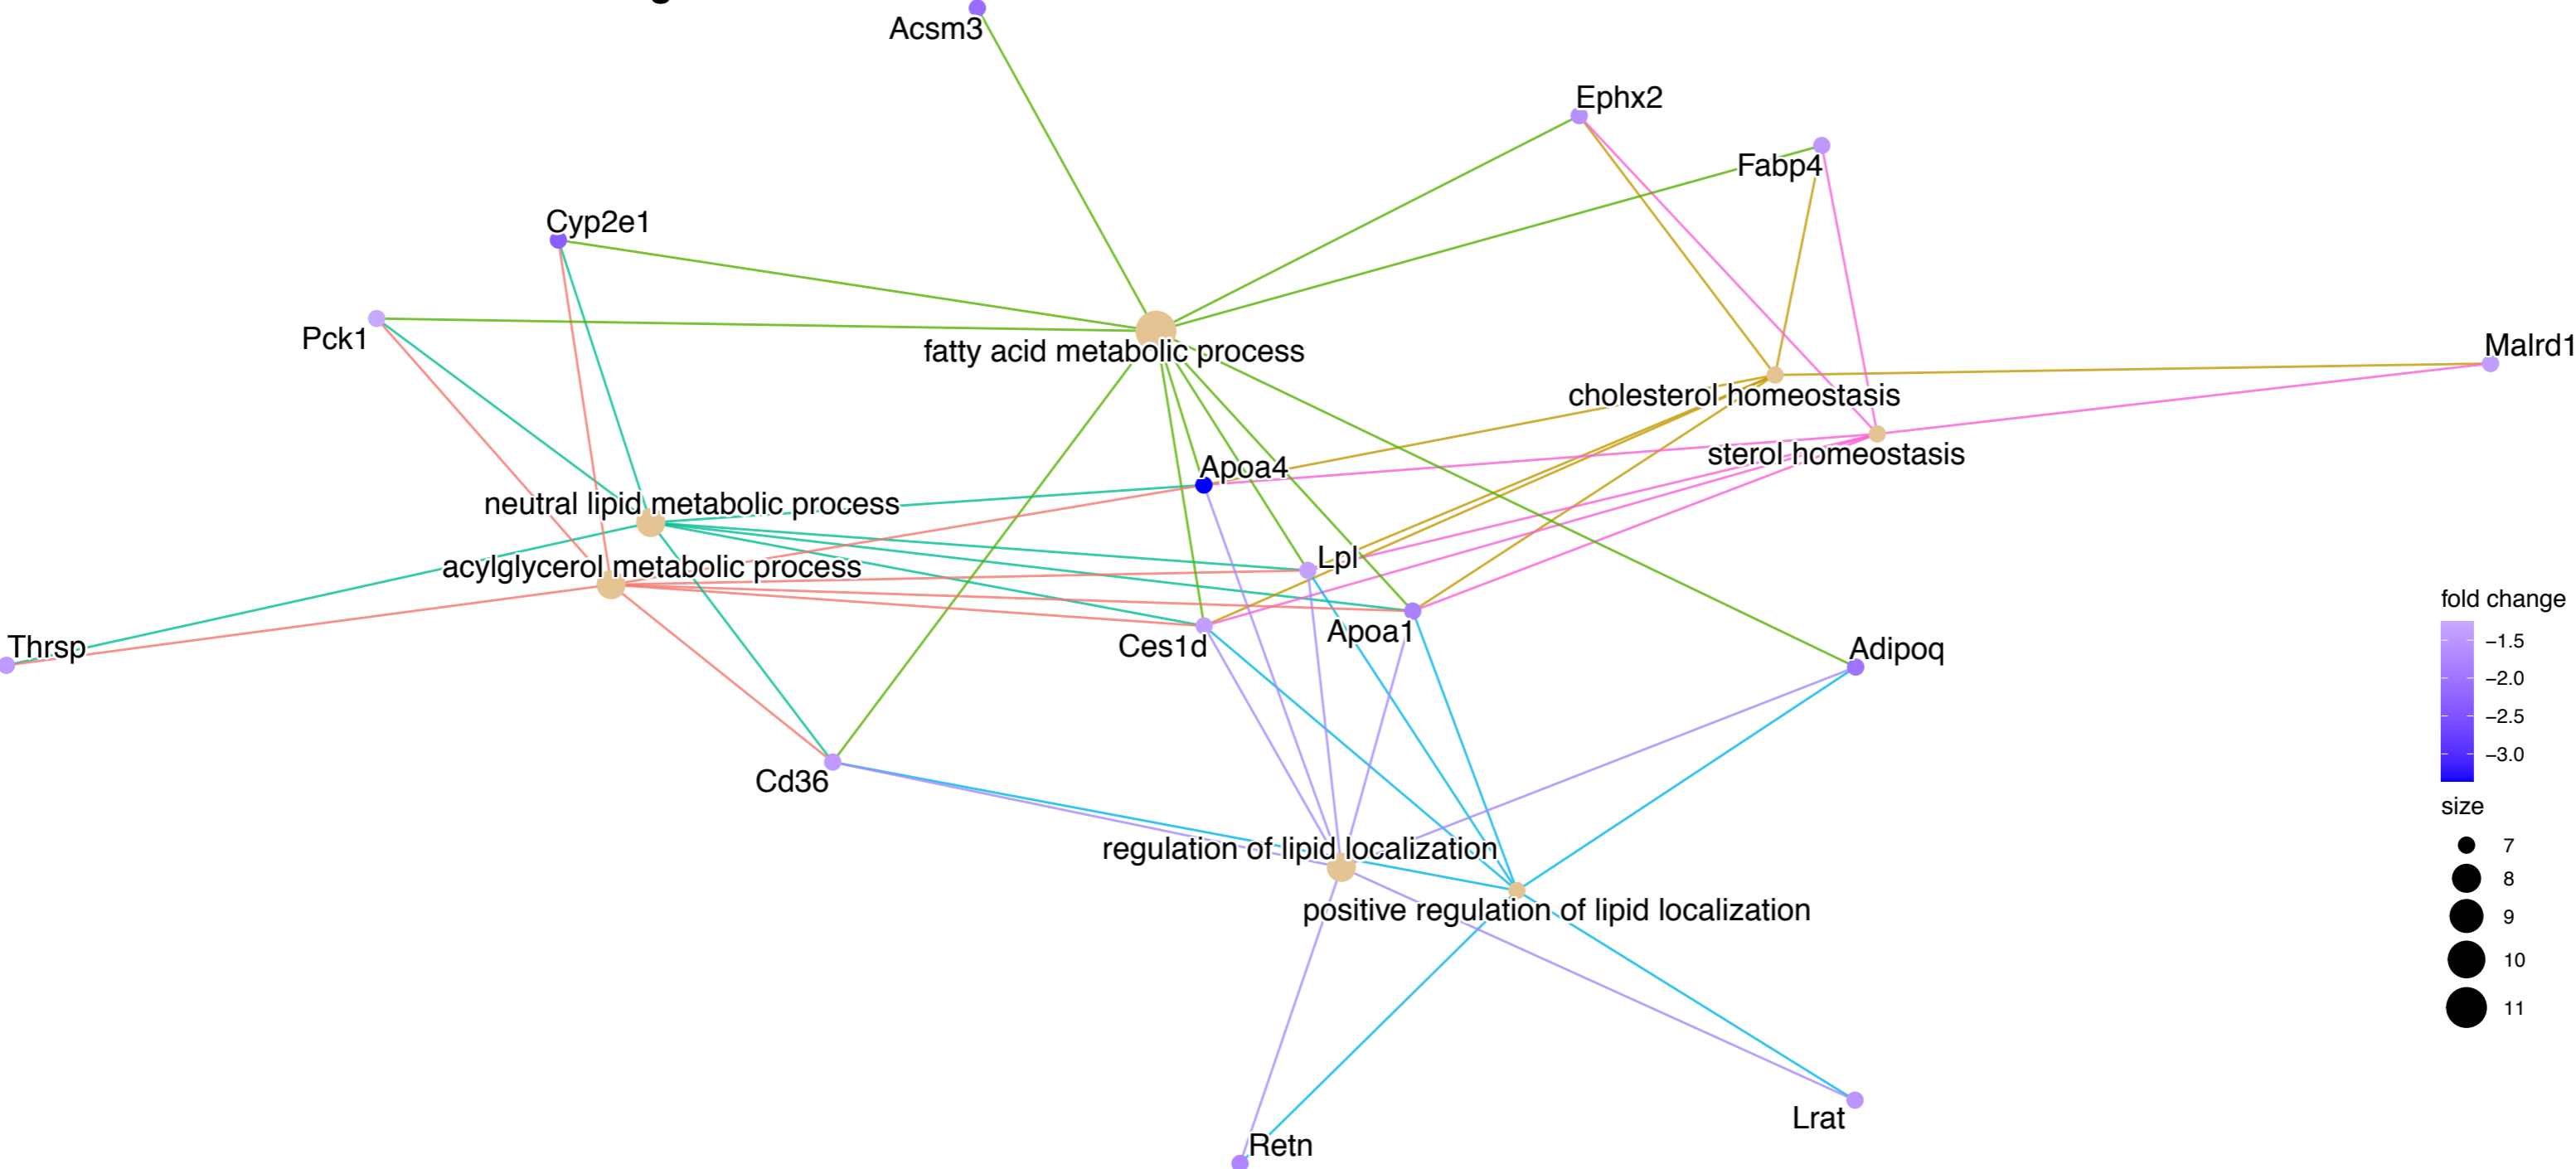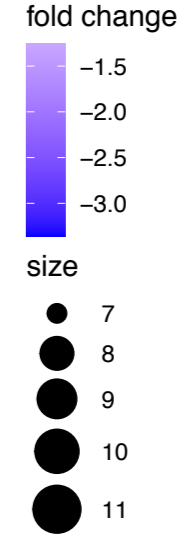



# E. ATCC25526 vs control up-regulated

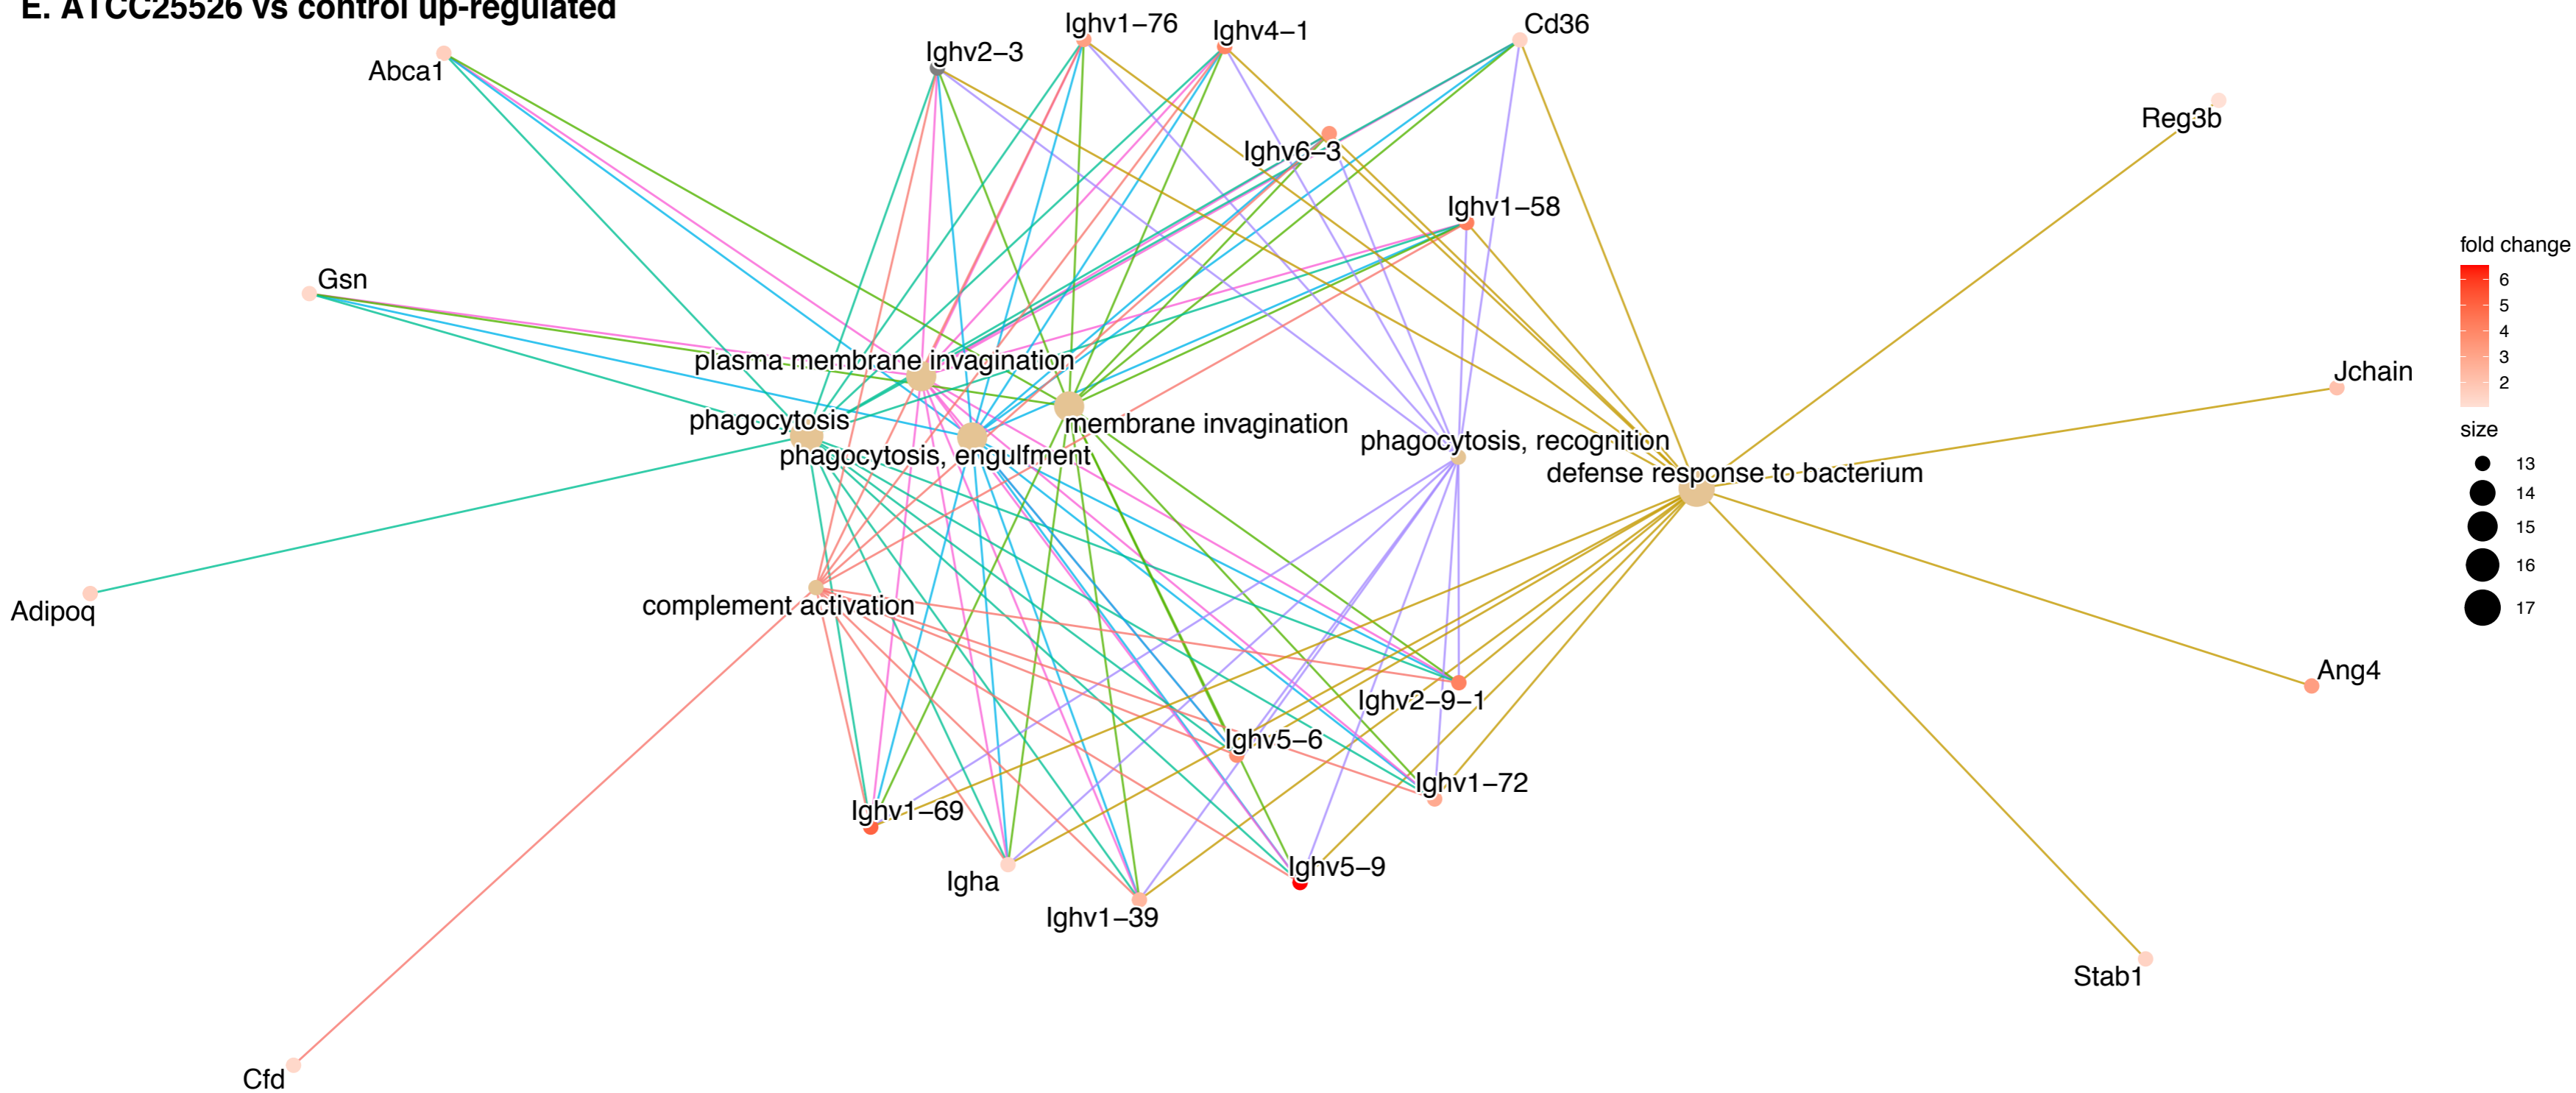

Supplement: 41598_2023_27706_MOESM1_ESM.pdf [file 41598_2023_27706_MOESM1_ESM.pdf]
